# Supplementary material for: Race, Stigma, and Mental Health Referrals Among Clients of Aging Services Who Screened Positive for Depression
Source: Atypon-hosted journal article supplement (doi:10.1176/appi.ps.201200530), 2014-04-01
Supplement: 537_ds001.pdf [file 537_ds001.pdf]

### Anticipated Cost of Stigma scale (ACS)

**Instructions:** Many people are aware of the stigma of depression. They express concern about how their social group (e.g. friends and family) would react to them if they knew they were depressed or seeking mental health treatment.

I am interested in concerns you might have now if you were depressed or seeking help.

I will read a list of statements, please tell me how much you agree or disagree with each statement. After I read each statement, let me know if you “**strongly agree, agree, disagree, or strongly disagree.**”

“If I were depressed, I would be concerned that my friends and family may\_\_\_\_\_”

|     |                                  | Strongly<br>Disagree | Disagree | Agree | Strongly<br>Agree |
|-----|----------------------------------|----------------------|----------|-------|-------------------|
| 1a. | Exclude me                       | 1                    | 2        | 3     | 4                 |
| 1b. | Behave differently<br>towards me | 1                    | 2        | 3     | 4                 |
| 1c. | Expect less of me                | 1                    | 2        | 3     | 4                 |
| 1d. | Be critical of me                | 1                    | 2        | 3     | 4                 |
| 1e. | Judge me                         | 1                    | 2        | 3     | 4                 |
| 1f. | Distrust me                      | 1                    | 2        | 3     | 4                 |
| 1g. | Think I was weak                 | 1                    | 2        | 3     | 4                 |
